# Supplementary material
Source: publisher site journal article supplement (https://static.cambridge.org/content/id/urn:cambridge.org:id:article:S0376892919000407/resource/name/S0376892919000407supp001.docx)
Supplement: Supplementary file 1 [file S0376892919000407supp001.docx]

**SUPPLEMENTARY MATERIAL**

**Table S.1**: Table of data obtained through the Ballotpedia and the Trust for Public Land, Landvote databases (LBI 2017; TPL 2017) on local ballot initiatives dealing with open space areas passed in the State of California, United States of America (available online).

| Measure/Proposition | County | Subsidiary jurisdiction | Date of passage |
| --- | --- | --- | --- |
| Measure A | Marin | Novato | 08 April 2014 |
| Measure A | San Diego | Unknown | 02 November 2004 |
| Measure A | Sacramento | NA | 02 November 2004 |
| Measure A | Marin | Unknown | 06 November 2012 |
| Measures A & C | Sonoma | Sonoma County Agricultural Preservation & Open Space District | 06 November 1990 |
| Measures A & B | Los Angeles | City of Monrovia | 07 November 2000 |
| Measure AA | San Mateo, Santa Clara, & Santa Cruz | Midpeninsula Regional Open Space District | 03 June 2014 |
| Measure B | San Mateo | Town of Portola Valley | 04 November 1997 |
| Measure B | Santa Clara | Unknown | 06 June 2006 |
| Measure B | San Francisco | City of San Francisco | 06 November 2012 |
| Measure D | Orange | City of San Juan Capistrano | 10 April 1990 |
| Measure D | Marin | Marinwood Community Services District | 08 March 2005 |
| Measure DD | Alameda | City of Oakland | 05 November 2002 |
| Measure E | San Mateo | City of Belmont | 04 November 1997 |
| Measure E | Marin | Marin County Open Space District | 03 June 1997 |
| Measure F | Sonoma | Sonoma County Agricultural Preservation & Open Space District | 07 November 2006 |
| Measure G | Santa Cruz | City of Santa Cruz | 03 November 1998 |
| Measure G | San Mateo | City of San Carlos | 02 November 1999 |
| Measure G | San Luis Obispo | City of San Luis Obispo | 04 November 2014 |
| Measure G | Monterey | City of Pacific Grove | 06 November 1990 |
| Measure H | San Mateo | Town of Portola Valley | 08 November 2005 |
| Measure HH | Los Angeles | Mountains Recreation and Conservation Authority | 06 November 2012 |
| Measure I | Alameda | City of Oakland | 06 November 1996 |
| Measure K | Los Angeles | City of Los Angeles | 05 November 1996 |
| Measure K | Alameda | City of Oakland | 06 November 1990 |
| Measure M | Santa Clara | City of Cupertino | 05 March 2002 |
| Measure M | Orange | Unknown | 07 November 2006 |
| Measure MM | Los Angeles | Mountains Recreation and Conservation Authority | 06 November 2012 |
| Measure O | Yolo | City of Davis | 07 November 2000 |
| Measure O | Los Angeles | City of Los Angeles | 02 November 2004 |
| Measure Q | Santa Clara | Santa Clara County Open Space Authority | 04 November 2014 |
| Measure R | San Mateo | Town of Portola Valley | 03 November 2009 |
| Measure R | Alameda | City of Albany | 05 November 1996 |
| Measure S | San Mateo | Town of Portola Valley | 06 November 2001 |
| Measure S | Los Angeles | City of Claremont | 07 November 2006 |
| Measure T | Santa Clara | City of Cupertino | 06 November 1990 |
| Measure V | Los Angeles | City of Santa Monica | 07 November 2006 |
| Measure WW | Contra Costa & Alameda | East Bay Regional Park District | 04 November 2008 |
| Measure Y | San Luis Obispo | City of San Luis Obispo | 07 November 2006 |
| Measure Y | Orange | City of San Juan Capistrano | 08 November 2008 |
| Proposition A | Los Angeles | Unknown | 05 November 1996 |
| Proposition C | San Francisco | City of San Francisco | 07 March 2000 |
| Proposition C | San Diego | City of Carlsbad | 05 November 2002 |
| Resolution 2004-13 | Monterey | Monterey Peninsula Regional Park District | 02 August 2004 |
| Proposition 218 | Los Angeles | Santa Monica Mountains Open Space Preservation Assessment Districts 1 & 2 | 01 August 2002 |
| Measure H | Orange | City of Laguna Beach | 06 November 1990 |
| Untitled | Los Angeles | City of Santa Clarita | 10 July 2007 |
| Untitled | Los Angeles | City of Pasadena | 27 October 2008 |
| Measure A | Los Angeles | NA | 03 November 1992 |

**References**

Lucy Burns Institute (LBI) (2017) Ballotpedia: The Encyclopedia of American Politics. URL https://ballotpedia.org/Local_Ballot_Measures.

The Trust For Public Land (TPL) (2017) TPL LandVote Database. URL www.landvote.org.
